# Supplementary material for: Addition of malonyl radicals to glycals with C-1 acceptor groups: remarkable influence of the substituents on the product distributionElectronic supplementary information (ESI) available: NMR data for C-2 branched sugar derivatives. See http://www.rsc.org/suppdata/cc/b2/b202898k/
Source: Royal Society of Chemistry journal article supplement (doi:10.1039/b202898k), 2002-05-17
Supplement: b202898k.doc [file b202898k.doc]

**Supplementary data**

**Table 1.**1H NMR data for *C*-2 branched sugar derivatives measured in CDCl3 at 360 MHz .

| Com-pound | H-2  *J*2,3 | H-3  *J*3,4 | H-4  *J*4,5 | H-5 *J*5,6/*J*5,6’ | H-6/H-6’  *J*6,6’ | | H-7  *J*2,7 | CH3 | OMe | Others |
| --- | --- | --- | --- | --- | --- | --- | --- | --- | --- | --- |
| **2a** | 2.80  *12.3* | 5.12  *3.2* | 5.27  *1.0* | 3.87  *7.3*/*6.6* | 4.12/4.17  *11.2* | | 3.66  *3.7* | 1.98 2.02 2.11 | 3.47 3.71 3.72 | 4.85 *J*1,2= 8.8  H-1 |
| **2b** | 3.44  *11.7* | 5.94  *3.2* | 5.42  *1.1* | 4.47  *6.5*/*6.5* | 4.06/4.10  *11.0* | | 3.54  *4.2* | 1.88 2.01 2.13 | 3.47 3.67 3.72 | 5.84 6.57  CONH2 |
| **3c** | 3.29  *9.2* | 5.76  *3.7* | 5.47  *–* | 4.08-4.20 (m) | | | 3.54  *7.4* | 1.96 2.07 2.11 | 3.33 3.43 3.67 3.87 |  |
| **3d** | 3.31  *9.8* | 5.00  *2.9* | 5.37  *1.5* | 4.31  *7.0*/*6.1* | | 4.18/4.22  *11.5* | 3.22  *2.6* | 2.05 2.07 2.19 | 3.43 3.44 3.80 |  |
| **7a** | 3.27  *12.5* | 5.28  *3.2* | 5.42  *1.1* | 3.80  *7.5*/*6.4* | 4.08/4.17  *11.2* | | 3.55  *6.5* | 1.98 2.02 2.12 | 3.72  3.74 | 6.70 *J*1,2= 3.8  H-1 |
| **7b** | 3.35  *12.1* | 5.68  *2.6* | 5.54  *1.1* | 4.34  *4.7*/*7.9* | 3.96/4.51  *11.6* | | 4.44  *2.1* | 1.90 2.03 2.17 | 3.72 3.77 | 5.99 6.79  CONH2 |
| **8c** | 3.57  *11.9* | 5.68  *2.6* | 5.46  *–* | 4.41  *6.5/6.5* | 4.04/4.12  *11.1* | | 3.26  *3.5* | 2.05 2.07 2.19 | 3.43 3.44 3.80 | 4.34  OH |
| **9** | 3.40 *10.5* | 5.35  *3.0* | 5.64  *1.2* | 4.85  *6.8*/*6.8* | 4.22/4.26  *11.6* | | 4.05  *3.7* | 2.00 2.08 2.16 | 3.78 3.80 |  |

**Table 2.**13C NMR data for *C*-2 branched sugar derivatives measured in CDCl3 at 90 MHz .

| Com-pound | C-1 | C-2 | C-3,4,5 | C-6 | C-7 | OMe | C=O | CH3 | Others |
| --- | --- | --- | --- | --- | --- | --- | --- | --- | --- |
| **2a** | 103.5 | 43.5 | 67.6 71.2 72.1 | 63.1 | 49.2 | 53.9  54.0 | 170.0 170.3 171.3 171.9  172.0 | 22.1 22.3  22.4 |  |
| **2b** | 102.1 | 40.5 | 65.7  67.4  71.5 | 61.1 | 46.4 | 52.6  52.8 | 167.7 168.7 169.2 169.8 170.9 | 20.4 20.6  20.6 | 166.7  CONH2  (*J*=6.4 Hz) |
| **3c** | 102.5 | 40.3 | 64.2  67.3  69.1 | 61.6 | 48.1 | 49.3  51.2  52.0  53.2 | 166.4 167.4 169.3 170.0 170.3 | 20.4  20.5  20.6 |  |
| **3d** | 97.1 | 44.3 | 63.8  66.3  69.7 | 61.3 | 47.5 | 49.8  51.7  52.4 | 165.4 169.3 169.9 170.3 | 20.4  20.5  20.6 | 119.7  O**C**(OMe)2  116.2 CN  (*J*=3.2 Hz) |
| **7a** | 99.8 | 39.0 | 67.6  69.0  70.6 | 61.3 | 50.2 | 54.5  54.8 | 169.1 169.4 170.9 171.6  172.1 | 22.1 22.2  22.4 |  |
| **7b** | 98.6 | 37.4 | 66.3  69.6  70.8 | 61.8 | 48.6 | 49.5  52.4  52.7 | 167.4 169.0 169.3 170.0 170.5 | 20.5 20.6  20.66 | 169.7  CONH2  (singlet) |
| **8c** | 96.7 | 39.8 | 66.7  68.3  68.5 | 61.6 | 49.1 | 52.4  52.6  54.0 | 167.4  168.3 168.7  169.3 170.3  170.4 | 20.4  20.6  20.7 |  |
| **9** | See C=O | 42.1 | 64.7  68.6  74.1 | 61.1 | 50.1 | 52.8  53.1 | 167.8 167.9 168.1  169.5 169.6  170.1 | 20.3  20.4  20.5 |  |
